# Supplementary material
Source: PubMed Central journal article supplement (PMC4529034)
Supplement: supp_dev.124776_DEV124776supp.pdf [file supp_dev.124776_DEV124776supp.pdf]

SUPPLEMENTAL FIGURES

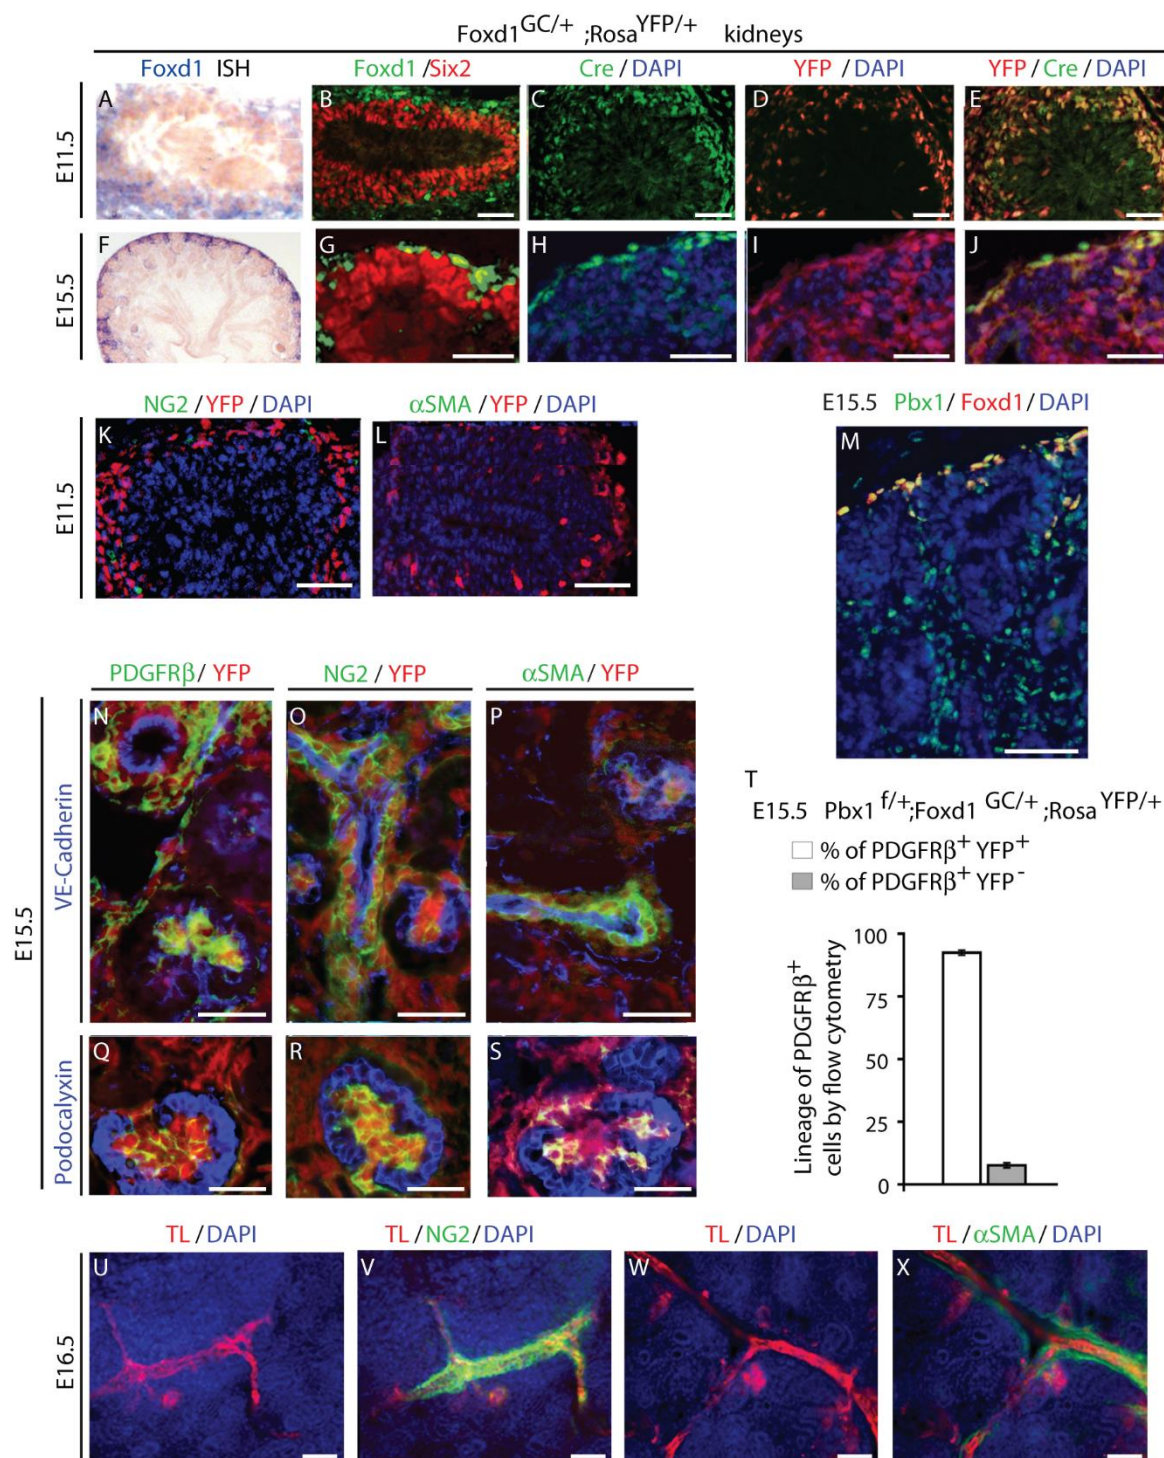

**Fig. S1, related to Fig. 1. Differentiation of the Foxd1 lineage into VMCs in the developing kidney.**

(A-J) Cre expression in the *Foxd1*<sup>GC/+</sup>;*Rosa*<sup>YFP/+</sup> line faithfully recapitulates *Foxd1* promoter activity and imparts a YFP tag to cells derived from Foxd1<sup>+</sup> progenitors. E11.5 (A-E) and

E15.5 (F-J) *Foxd1<sup>GC/+</sup>;Rosa<sup>YFP/+</sup>* kidneys assayed for in situ detection of *Foxd1* mRNA (A,F); IF detection of Foxd1 and Six2 (B,G) and Cre (C,E,H,J). Foxd1-derivatives were detected by YFP fluorescence (D,E,I,J). Scale bar B-J=50  $\mu$ m. (K-L) Foxd1<sup>+</sup> progenitors lack VMC markers at the onset of kidney development. E11.5 *Foxd1<sup>GC/+</sup>;Rosa<sup>YFP/+</sup>* kidneys assayed by IF for the detection of VMC markers NG2 (K) and  $\alpha$ SMA (L). Scale bar =50  $\mu$ m. (M) E15.5 kidneys were analyzed by IF for the detection of Pbx1 and Foxd1. Scale bar =100  $\mu$ m. (N-S) E15.5 *Foxd1<sup>GC/+</sup>;Rosa<sup>YFP/+</sup>* kidneys assayed by IF for the detection of VECAD (N-P) to reveal endothelial structures, Podocalyxin (Q-S) to reveal podocytes and vascular mural cell markers including *PDGFR $\beta$*  (N,Q) and NG2 (O,R) and  $\alpha$ SMA (P,S). Foxd1 derivatives were detected by YFP fluorescence. Scale bar (N-P)=50  $\mu$ m; (Q-S)=30  $\mu$ m. (T) Flow cytometry of dissociated E15.5 *Pbx1<sup>Ctrl</sup>;Rosa<sup>YFP</sup>* kidneys (n=18) after immunostaining for PDGFR $\beta$  reveal that the vast majority of PDGFR $\beta$ <sup>+</sup> cells in the developing kidney derive from Foxd1<sup>+</sup> progenitors. (U-X) Cells expressing VMC markers localize around blood-conducting vessels. E16.5 kidneys were processed by intravital dye labeling Tomato Lectin (TL) to identify blood-conducting vessels (U-X) and IF to detect the VMC markers NG2 (V) and  $\alpha$ SMA (X). Scale bar =50  $\mu$ m.

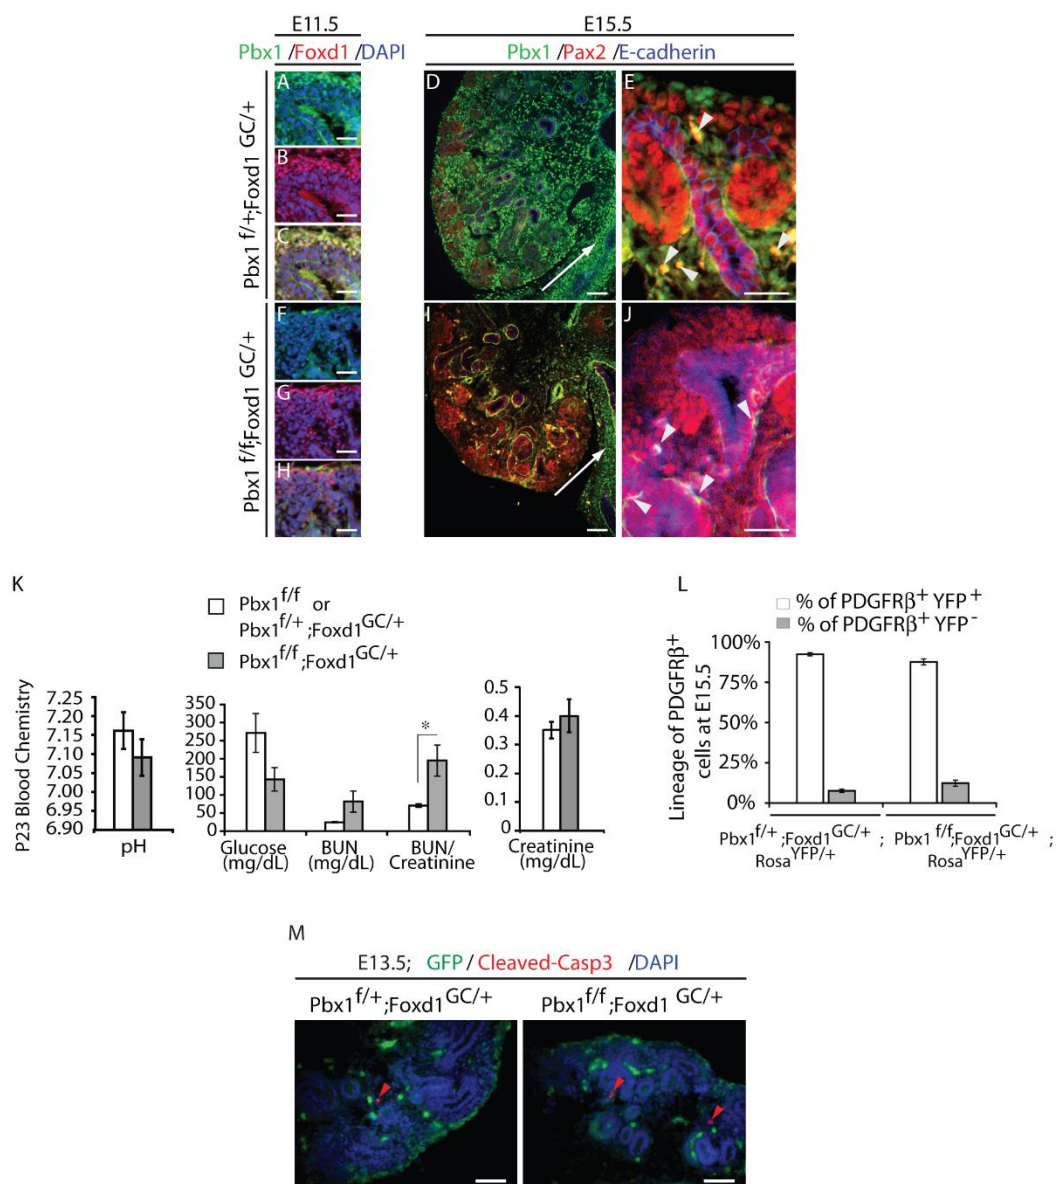

**Fig. S2, related to Fig. 2. Foxd1-Cre mediated *Pbx1* inactivation results in impaired kidney function and lethality within the first weeks of life.** (A-J) Efficient Foxd1-Cre mediated *Pbx1* inactivation. Control *Pbx1*<sup>f/+</sup>; *Foxd1*<sup>GC/+</sup> and mutant *Pbx1*<sup>f/f</sup>; *Foxd1*<sup>GC/+</sup> kidneys at E11.5 (A-C, F-H); scale bar =30 μm and E15.5 (D,E,I,J) kidneys assayed for the detection of Pbx1 and Foxd1 (A-H); Pax2 and E-cadherin (D,E,I,J). Scale bar D,I =50 μm; E,J =25 μm. (D,I) White arrows indicate ureteric mesenchyme. (E,J) White arrowheads indicate nephron progenitors co-expressing Pbx1 and Pax2. (K) Postnatal renal function was assessed by measuring plasma glucose concentration, blood pH, blood urea nitrogen (BUN) and creatinine levels in mutant *Pbx1*<sup>f/f</sup>; *Foxd1*<sup>GC/+</sup> (n=3) and control *Pbx1*<sup>f/+</sup>; *Foxd1*<sup>GC/+</sup> or *Pbx1*<sup>f/f</sup> littermates (n=4) (*i-STAT*<sup>®</sup> system). Error bars; ± s.e.m. \**P*=0.019, \*\**P*=0.007.

(L) Quantitation of the percent of PDGFR $\beta^+$  cells that express YFP in E15.5 control *Pbx1<sup>f/+</sup>;Foxd1<sup>GC/+</sup>;Rosa<sup>YFP/+</sup>* (n=18 kidney pairs) and mutant *Pbx1<sup>f/f</sup>;Foxd1<sup>GC/+</sup>; Rosa<sup>YFP/+</sup>* kidneys (n=14 kidney pairs) as determined by FACS analyses. (M) IF analysis of apoptosis by Cleaved Caspase-3 staining in E13.5 control *Pbx1<sup>f/+</sup>;Foxd1<sup>GC/+</sup>* and mutant *Pbx1<sup>f/f</sup>;Foxd1<sup>GC/+</sup>* kidneys (n=2 per genotype). Red arrowheads indicate apoptotic cells. Scale bar=50  $\mu$ m.

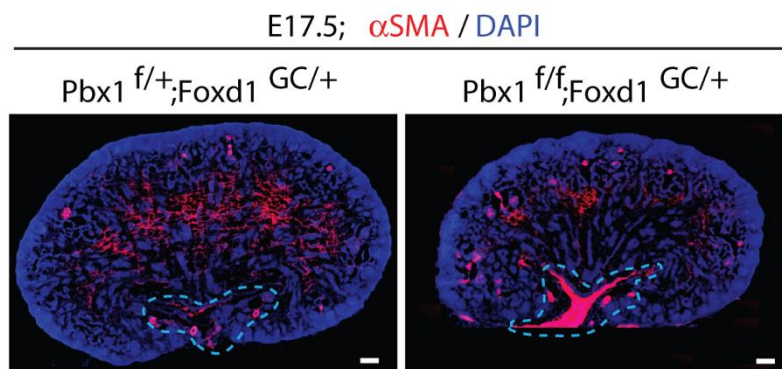

**Fig. S3, related to Fig. 3. Medullary interstitium development is impaired in *Pbx1<sup>f/f</sup>;Foxd1<sup>GC/+</sup>* kidneys.**

Immunodetection of  $\alpha$ SMA<sup>+</sup> medullary interstitium in E17.5 kidney sections of indicated genotypes. Dashed blue outline indicates the  $\alpha$ SMA<sup>+</sup> ureteric mesenchyme that is excluded from quantification. Scale bar= 50  $\mu$ m.





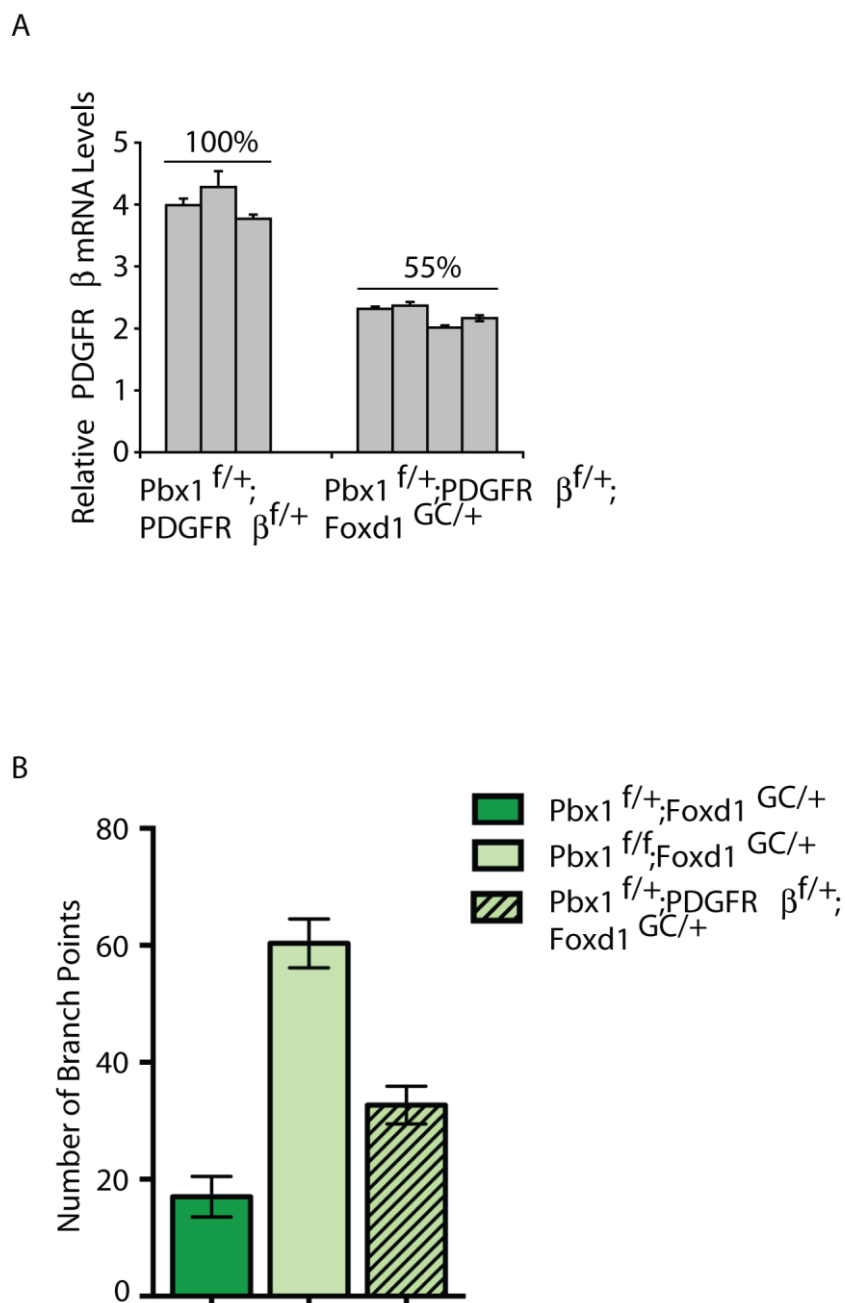

**Fig. S5, related to Fig. 6. Inactivation of one allele of *PDGFR $\beta$*  by Foxd1-Cre efficiently reduces *PDGFR $\beta$*  mRNA levels**

(A) Relative expression levels of *PDGFR $\beta$*  transcripts in E15.5 control *Pbx1*<sup>f/+</sup>; *Foxd1*<sup>GC/+</sup> (n=3 kidney pairs) and *Pbx1*<sup>f/+</sup>; *PDGFR* $\beta$ <sup>f/+</sup>; *Foxd1*<sup>GC/+</sup> (n=4 kidney pairs) by RT-qPCR. Normalization to *Tbp* mRNA levels. Error bars  $\pm$  s.e.m. (B) Quantification of arterial branch points (mean  $\pm$  s.d.) in E13.5 control *Pbx1*<sup>f/+</sup>; *Foxd1*<sup>GC/+</sup>, mutant *Pbx1*<sup>f/f</sup>; *Foxd1*<sup>GC/+</sup> and *PDGFR* $\beta$ <sup>het</sup> rescue *Pbx1*<sup>f/f</sup>; *PDGFR* $\beta$ <sup>f/+</sup>; *Foxd1*<sup>GC/+</sup> kidneys. n>3 per genotype.

## SUPPLEMENTARY MATERIALS AND METHODS

### Antibodies

Primary antibodies used include anti- $\alpha$ SMA-Cy3 (Sigma C6198), anti-PDGFR $\beta$  (Cell Signaling Technology 3169, Novus Biologicals NBP1-43349), anti-Pbx1 (Cell Signaling Technology 4342), anti-GFP (Aves Labs GFP-1020), anti-CD31/Pecam1 (BD Pharmingen 550274), anti-Foxd1 (Novus Biologicals NBP1-30959), anti-VECAD (R&D Systems AF1002), Anti-Cre (Millipore MAB5320), anti-Six2 (Santa Cruz sc-67837), anti-Pax2 (Cell Signaling 9666), anti-NG2 (Millipore MAB5320), anti-E-cadherin (R&D Systems AF748), anti-Villin-1 (Cell Signaling 2369), anti-Podocalyxin (R&D Systems AF1556), anti-Calbindin-28 (Sigma C9848), anti-cleaved-Caspase3 (Promega G7481).

### TaqMan Gene Expression Assays

*Pbx1* Mm04207617\_m1      *Pbx2* Mm00479560\_m1  
*Pbx3* Mm00479413\_m1      *Tbp* Mm00446971\_m1  
*PDGFR $\beta$*  Mm00435546\_m1      *PDGFR $\beta$*  Mm00435564\_m1

### Oligonucleotides

Oligonucleotides were synthesized by Operon Biotechnology. All the oligonucleotides used for PCR assays were designed using the Primer3 website (<http://frodo.wi.mit.edu/primer3/>).

### Chromatin Immunoprecipitation Primers

E1 For TTGCCCAAATCTCTCTGCTT  
E1 Rev CTCAGAGTGCTGGGTTTGGT  
E2 For AGACACGGTAGGTGGAGGTG  
E2 Rev GGAGAGAGGAGCCAGGTTCT  
E3 For CTCCGTTGGTTTCAACCTGT  
E3 Rev GCTGACAGGGCTGGAGTTAG  
OUT For ATGGCTGGGTATCTCCAGTG  
OUT Rev TCTAATCCCAAATGGCAAGC

### **Transcriptional Reporter Assay Primers**

E1wtFOR GGGGTACCTCCTCTGTGAGGAGGGATTG

E1wtREV CGAGCTCCCGTGGGGTAGAGGAAACTT

E2FOR CCGCTCGAGCTGGGCAGCCTTACAGTCTC

E2REV GAAGATCTCCCAAATGCTCTCCTCTCTG

E3FOR GGGGTACCCACCTTCTCCAGTGTGCTGA

E3REV CCGCTCGAGTCATCGCTGGCCATATAACA

E1Mut FOR.1 TCCTTCATTGCCAGTCTGTTGTTTTCC

E1Mut REV.1 GGAAAACAACAGACTGGCAATGAAGGA

E1Mut FOR.2 CCTTTCTCTATGTTGATGGCAATGACACC

E1Mut REV.2 GGTGTCATTGCCATCAACATAGAGAAAGG
